# Supplementary material
Source: ML conference proceedings conference paper supplement (https://openaccess.thecvf.com/content/ICCV_2019/html/Zhou_Deep_Single-Image_Portrait_ICCV_2019_paper.html)
Supplement: Supplementary file 3 [file Zhou_Deep_Single-Image_Portrait_ICCV_2019_supplemental.zip]

Archive with 9 entries (6 files):
- supplementary/
- supplementary/.DS_Store
- __MACOSX/
- __MACOSX/supplementary/
- __MACOSX/supplementary/._.DS_Store
- supplementary/supplementary.pdf
- __MACOSX/supplementary/._supplementary.pdf
- supplementary/demo.mp4
- __MACOSX/supplementary/._demo.mp4
